# Supplementary material
Source: publisher figshare collection journal article supplement (https://acs.figshare.com/ndownloader/files/3950350)
Supplement: Supplementary file 1 [file 3950350]

# **Long Residence Time Inhibition of EZH2 in Activated Polycomb Repressive Complex 2**

Glenn S. Van Aller, Melissa Baker Pappalardi, Heidi M. Ott, Elsie  
Diaz, Martin Brandt, Benjamin J. Schwartz, William H. Miller,  
Dashyant Dhanak, Michael T. McCabe, Sharad K. Verma, Caretha L.  
Creasy, Peter J. Tummino and Ryan G. Kruger

**Supplementary Information**

# Supplementary Figure 1

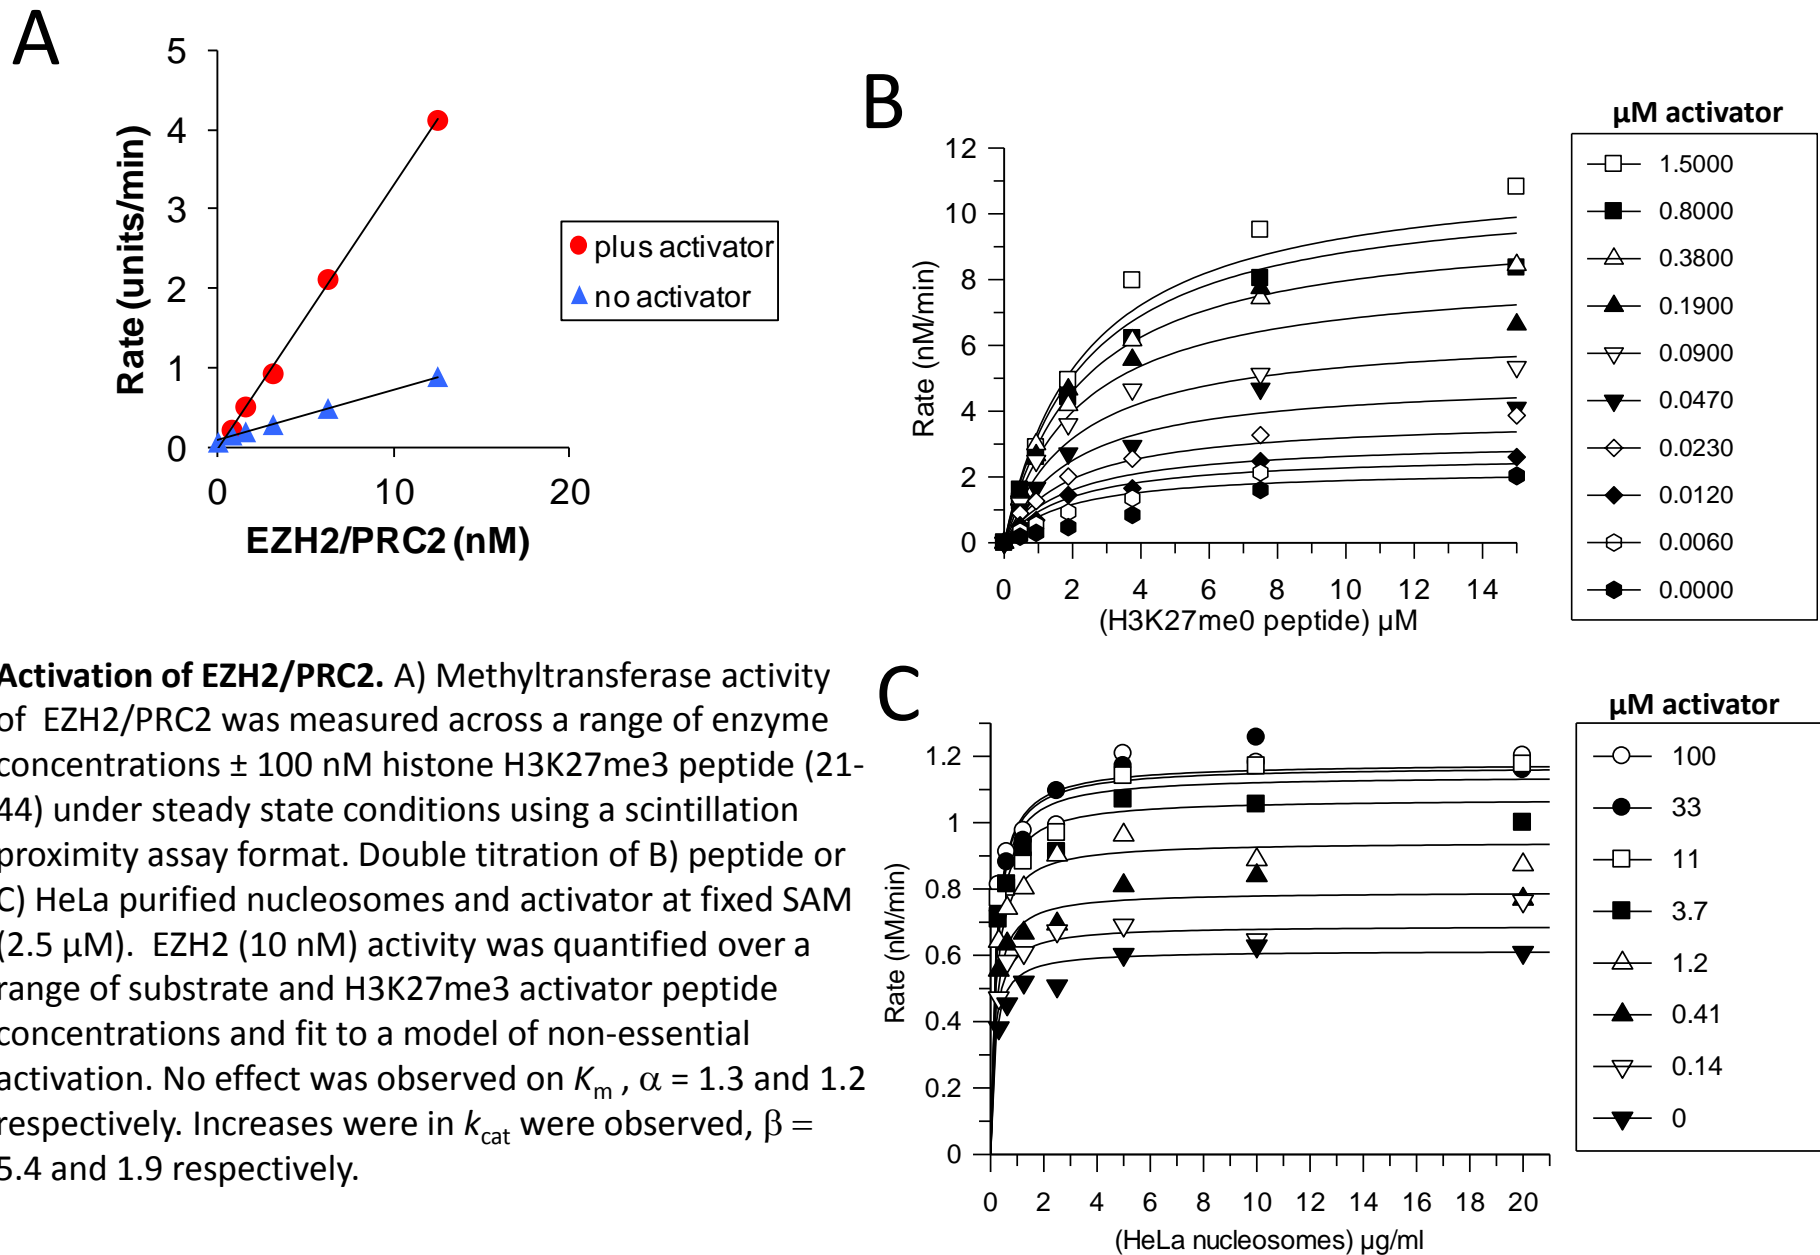

# Supplementary Table 1

| EZH2/PRC2 | $K_a$ app (nM) | $\beta$ , as defined in Figure 1B |
|-----------|----------------|-----------------------------------|
| Wild type | 86             | 7.4                               |
| A677G     | 33             | 3.1                               |
| Y641F     | 5.7            | 4.5                               |

**Apparent activation constants ( $K_a^{app}$ ) for mutant EZH2.** Peptide substrate (H3 21-44) substrate was fixed at  $K_m$  for each mutant or wild type EZH2. Methyltransferase activity was quantified over a range of H3K27me3 activator peptide concentrations and fit to Eq 1 assuming  $\alpha = 1$ .

## Supplementary Figure 2

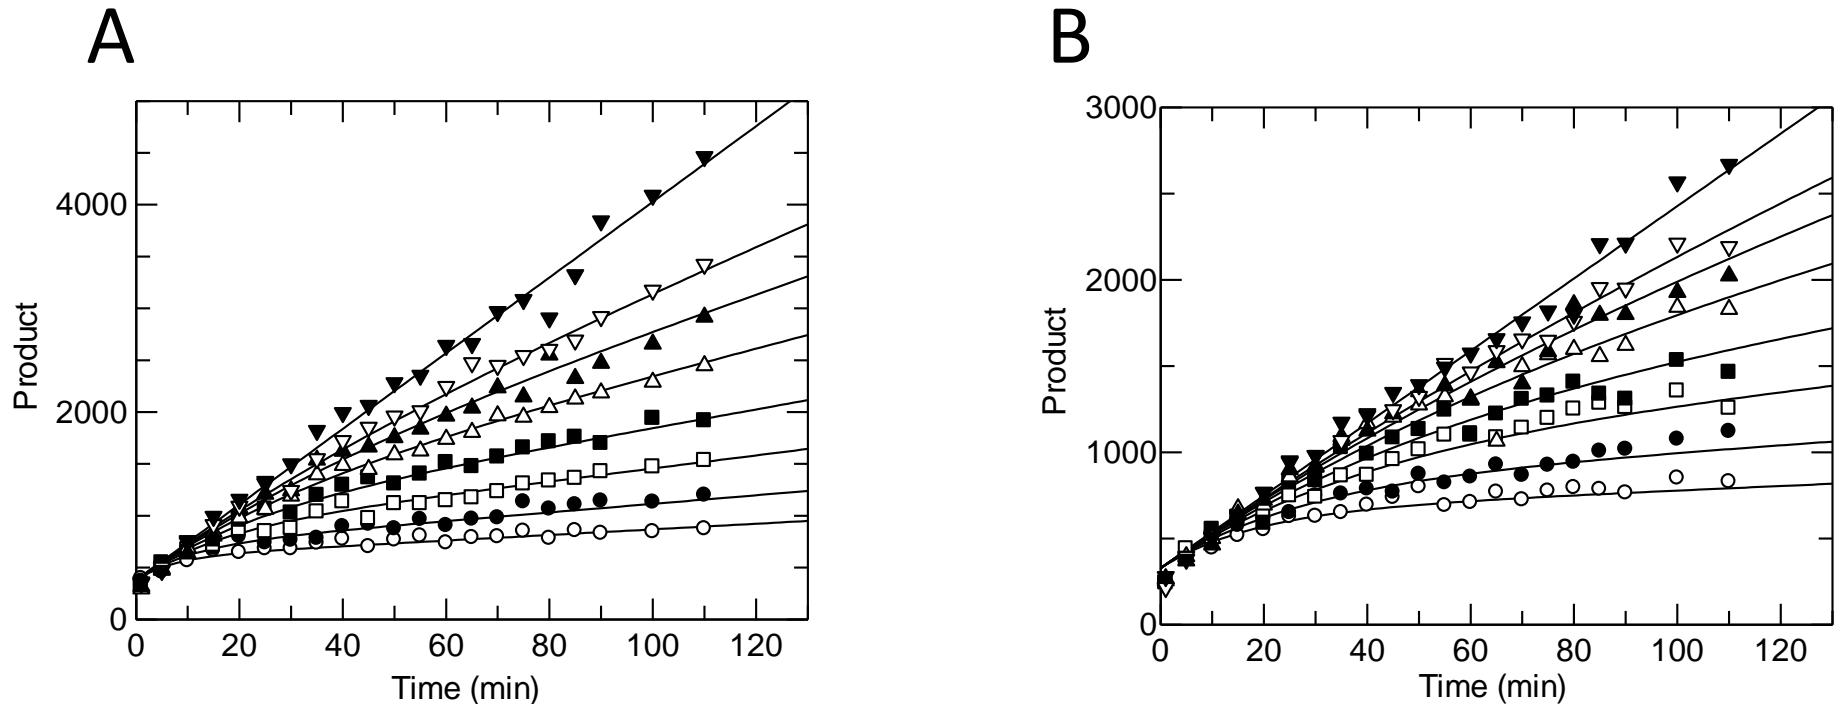

**EZH2 reaction progress curves.** Time course data using A) wild type (230 pM) or B) Y641F (220 pM) mutant EZH2, for uninhibited ( $\blacktriangledown$ ), and inhibited reactions at 0.5 nM ( $\triangledown$ ), 0.8 nM ( $\blacktriangle$ ), 1.2 nM ( $\triangle$ ), 2 nM ( $\blacksquare$ ), 3 nM ( $\square$ ), 5 nM ( $\bullet$ ), and 8 nM ( $\circ$ ), of GSK126. Enzymes were pre-activated with 1  $\mu$ M K27me3 peptide and the reactions were run at 10  $\mu$ M peptide substrate and 0.3  $\mu$ M SAM. Progress curve data were fit globally to Eq 2.

**Supplementary Table 2. Summary of kinetic parameters for GSK126 using activated EZH2/PRC2**

| EZH2/PRC2 | $k_{\text{on}}$ (min <sup>-1</sup> ) | $k_{\text{off}}$ (min <sup>-1</sup> ) | $t_{1/2}$ (min) | Residence time (min) | $K_i$ (nM) | $K_i^*$ (nM) |
|-----------|--------------------------------------|---------------------------------------|-----------------|----------------------|------------|--------------|
| Wild type | 0.20 ± 0.02                          | 0.016 ± 0.005                         | 44 ± 14         | 64 ± 20              | 4.7 ± 0.5  | 0.37 ± 0.07  |
| A677G     | 0.11 ± 0.04                          | 0.013 ± 0.001                         | 54 ± 6          | 77 ± 8               | 0.87 ± 0.2 | 0.093 ± 0.01 |
| Y641F     | 0.18 ± 0.01                          | 0.024 ± 0.001                         | 30 ± 1          | 43 ± 1               | 1.8 ± 0.4  | 0.21 ± 0.04  |

Forward progress curves data were fit globally as described in the methods to determine  $k_{\text{on}}$ ,  $k_{\text{off}}$ ,  $K_i$  and  $K_i^*$  using allosterically activated PRC2 containing wild type or mutant EZH2. Rapid dilution experiments were used to confirm reversibility and to confirm  $k_{\text{off}}$  for GSK126.

# Supplementary Table 3

| Reconstituted NCPs   | $K_a$ ( $\mu\text{M}$ ) | $\beta$       | $\alpha$      | $K_M$ (nM) | $k_{cat}$ ( $\text{min}^{-1}$ ) | $k_{cat}/K_M$ ( $\text{min}^{-1} \text{nM}^{-1}$ )<br>$\times 10^{-3}$ |
|----------------------|-------------------------|---------------|---------------|------------|---------------------------------|------------------------------------------------------------------------|
| unmarked             | $3.8 \pm 1.8$           | $11 \pm 1$    | $2.1 \pm 0.3$ | $21 \pm 1$ | $0.017 \pm 0.001$               | $0.83 \pm 0.12$                                                        |
| heterodimer H3K27me3 | $0.9 \pm 0.5$           | $8.4 \pm 0.3$ | $1.9 \pm 0.3$ | $16 \pm 2$ | $0.020 \pm 0.001$               | $1.3 \pm 0.28$                                                         |

- Activation of EZH2/PRC2 using reconstituted NCPs.** Results were compiled from double titration experiments using activator peptide and recombinant NCPs without epigenetic modification or NCPs with a mixture of H3K<sub>c</sub>27me3 and unmarked H3. The data shown are an average  $\pm$  standard deviation from 2 independent experiments. Figure 1C and 1D show plots of representative data and Figure 1B shows a scheme describing the model of activation.

## Supplementary Figure 3

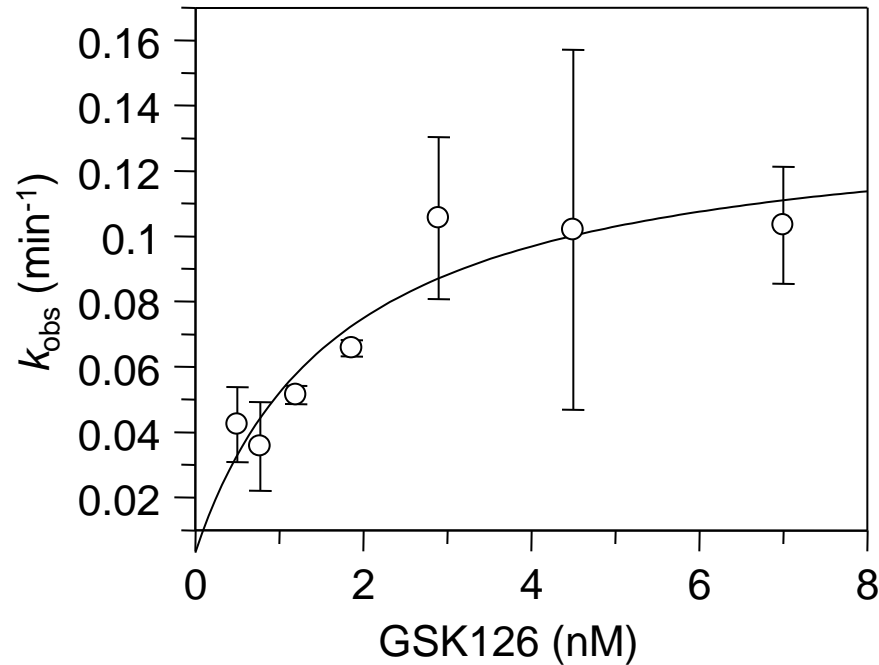

### **Observed rate constant of inactivation as a function of inhibitor concentration.**

Reaction progress curve data were fit to equation 2 in the presence of the indicated concentrations of GSK126. EZH2 (230 pM) was pre-activated with 1  $\mu\text{M}$  K27me3 peptide and the reaction was run at 10  $\mu\text{M}$  peptide substrate and 0.3  $\mu\text{M}$  SAM.

# Supplementary Figure 4

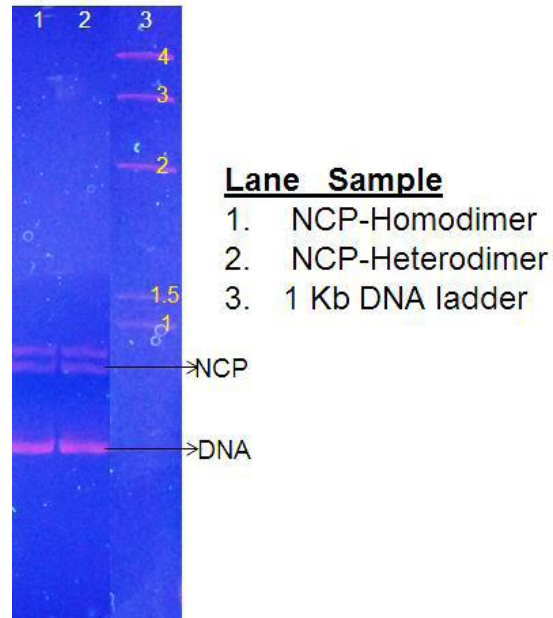

**Electrophoretic Mobility Shift Assay.** Ethidium bromide-stained 0.8% agarose gel electrophoresis of the final nucleosome core particles (NCP) used in Figure 1.
